# Supplementary material for: Structural robustness of the gut mucosal microbiota is associated with Crohn's disease remission after surgery
Source: PubMed Central journal article supplement — Gut. 2015 Dec 1;65(6):954–62. doi: 10.1136/gutjnl-2015-309184 (PMC4893116; doi:10.1136/gutjnl-2015-309184), 2015-12-01
Supplement: gutjnl-2015-309184-s3.pdf [file gutjnl-2015-309184-s3.pdf]

| <b>Taxonomic level</b>        | <b>M0</b>    | <b>REC6</b> | <b>REM6</b> | <b>p-value</b> |
|-------------------------------|--------------|-------------|-------------|----------------|
| <b>Bacilli</b>                | 19,064±8,956 | 3,781±1,309 | 0,897±0,228 | 0,007          |
| <b>Lactobacillales</b>        | 16,181±8,078 | 3,265±1,088 | 0,771±0,19  | 0,011          |
| <b>Streptococcaceae</b>       | 14,196±7,14  | 2,415±1,011 | 0,617±0,168 | 0,011          |
| <b><i>Streptococcus</i></b>   | 14,085±7,163 | 2,394±1,015 | 0,59±0,175  | 0,012          |
| <b>Alphaproteobacteria</b>    | 8,326±2,956  | 2,621±1,658 | 0,526±0,191 | 0,008          |
| <b>Betaproteobacteria</b>     | 7,583±2,699  | 2,152±0,782 | 1,926±0,828 | 0,017          |
| <b>Burkholderiales</b>        | 7,56±2,686   | 2,083±0,737 | 1,926±0,828 | 0,016          |
| <b>Oxalobacteraceae</b>       | 4,585±2,48   | 0,8±0,301   | 0,305±0,098 | 0,021          |
| <b>Clostridiaceae</b>         | 3,242±2,214  | 0,042±0,042 | 0,008±0,004 | 0,039          |
| <b>Clostridiaceae 1</b>       | 3,242±2,214  | 0,042±0,042 | 0,008±0,004 | 0,039          |
| <b>Bacillales</b>             | 2,883±1,129  | 0,516±0,278 | 0,127±0,041 | 0,002          |
| <b>Staphylococcaceae</b>      | 2,504±1,143  | 0,423±0,212 | 0,119±0,041 | 0,006          |
| <b>Sphingomonadales</b>       | 1,862±1,009  | 0,434±0,208 | 0,116±0,056 | 0,028          |
| <b>Sphingomonadaceae</b>      | 1,862±1,009  | 0,434±0,208 | 0,116±0,056 | 0,028          |
| <b><i>Sphingomonas</i></b>    | 1,862±1,009  | 0,434±0,208 | 0,116±0,056 | 0,028          |
| <b>Carnobacteriaceae</b>      | 1,839±0,977  | 0,224±0,124 | 0,057±0,031 | 0,013          |
| <b>Granulicatella</b>         | 1,839±0,977  | 0,224±0,124 | 0,057±0,031 | 0,013          |
| <b><i>Gemella</i></b>         | 1,784±0,794  | 0,302±0,188 | 0,063±0,029 | 0,006          |
| <b>Peptostreptococcaceae</b>  | 1,768±0,946  | 0,009±0,007 | 0,018±0,01  | 0,008          |
| <b><i>Sporacetigenium</i></b> | 1,707±0,89   | 0,002±0,002 | 0,01±0,008  | 0,006          |
| <b>Deinococcus-Thermus</b>    | 1,535±0,684  | 0,735±0,364 | 0,058±0,021 | 0,028          |
| <b>Deinococci</b>             | 1,535±0,684  | 0,735±0,364 | 0,058±0,021 | 0,028          |
| <b>Thermales</b>              | 1,535±0,684  | 0,735±0,364 | 0,058±0,021 | 0,028          |
| <b>Thermaceae</b>             | 1,535±0,684  | 0,735±0,364 | 0,058±0,021 | 0,028          |
| <b><i>Thermus</i></b>         | 1,535±0,684  | 0,735±0,364 | 0,058±0,021 | 0,028          |
| <b>Phyllobacteriaceae</b>     | 1,415±0,684  | 0,178±0,107 | 0,067±0,04  | 0,008          |
| <b><i>Mesorhizobium</i></b>   | 1,415±0,684  | 0,178±0,107 | 0,067±0,04  | 0,008          |
| <b>Sphingobacteria</b>        | 0,934±0,503  | 0,096±0,06  | 0,084±0,049 | 0,02           |
| <b>Sphingobacteriales</b>     | 0,934±0,503  | 0,096±0,06  | 0,084±0,049 | 0,02           |

|                           |             |              |              |       |
|---------------------------|-------------|--------------|--------------|-------|
| <b>Chitinophagaceae</b>   | 0,844±0,457 | 0,082±0,058  | 0,077±0,049  | 0,021 |
| <b>Staphylococcus</b>     | 0,719±0,433 | 0,121±0,047  | 0,056±0,021  | 0,041 |
| <b>Bradyrhizobiaceae</b>  | 0,556±0,211 | 0,072±0,068  | 0,029±0,023  | 0,002 |
| <b>Bradyrhizobium</b>     | 0,556±0,211 | 0,072±0,068  | 0,029±0,023  | 0,002 |
| <b>Pseudomonadaceae</b>   | 0,282±0,175 | 0,006±0,006  | 0,011±0,011  | 0,027 |
| <b>Pseudomonas</b>        | 0,282±0,175 | 0,006±0,006  | 0,011±0,011  | 0,027 |
| <b>Turicibacter</b>       | 0,077±0,036 | 0±0          | 0,016±0,012  | 0,017 |
| <b>Lachnospiraceae</b>    | 7,388±2,793 | 31,014±7,822 | 27,172±4,778 | 0,045 |
| <b>Dorea</b>              | 1,081±0,438 | 2,445±0,726  | 5,996±0,943  | 0,001 |
| <b>Incertae Sedis XIV</b> | 1,008±0,262 | 12,127±3,771 | 7,617±1,228  | 0,026 |
| <b>Blautia</b>            | 1,008±0,262 | 12,127±3,771 | 7,617±1,228  | 0,026 |
| <b>Porphyromonadaceae</b> | 0,349±0,207 | 7,803±3,416  | 1,125±0,254  | 0,035 |
| <b>Parabacteroides</b>    | 0,272±0,174 | 7,284±3,479  | 0,641±0,211  | 0,046 |

**Supp. Table 2: Differentially represented taxa between samples collected at time 0 and 6 months after ICR**

Shade less and grey shade lines indicate respectively increased taxa in samples either collected at M0 or M6 in patients with endoscopic recurrence (REC6) or in remission (REM6). Statistics was assessed by ANOVA.
