# Supplementary material for: Structural robustness of the gut mucosal microbiota is associated with Crohn's disease remission after surgery
Source: PubMed Central journal article supplement — Gut. 2015 Dec 1;65(6):954–62. doi: 10.1136/gutjnl-2015-309184 (PMC4893116; doi:10.1136/gutjnl-2015-309184), 2015-12-01
Supplement: gutjnl-2015-309184-s4.pdf [file gutjnl-2015-309184-s4.pdf]

| Taxa                       | REC6         | REM6         | p-value |
|----------------------------|--------------|--------------|---------|
| <b>Bacilli</b>             | 3,781±1,309  | 0,897±0,228  | 0,023   |
| <b>Lactobacillales</b>     | 3,265±1,088  | 0,771±0,19   | 0,015   |
| <b>Enterococcaceae</b>     | 0,597±0,361  | 0,009±0,008  | 0,011   |
| <b><i>Enterococcus</i></b> | 0,597±0,361  | 0,009±0,008  | 0,011   |
| <b>Bacteroidaceae</b>      | 13,145±4,893 | 29,586±5,346 | 0,04    |
| <b><i>Bacteroides</i></b>  | 13,145±4,893 | 29,586±5,346 | 0,04    |
| <b><i>Dorea</i></b>        | 2,445±0,726  | 5,996±0,943  | 0,008   |
| <b><i>Ruminococcus</i></b> | 0,213±0,105  | 2,348±0,983  | 0,036   |
| <b><i>Dialister</i></b>    | 0±0          | 0,88±0,516   | 0,028   |

**Supp. Table 3: Differentially represented taxa between samples from patients in remission or with endoscopic recurrence at 6 months after ICR**

Shade less and grey shade lines indicate respectively increased taxa in patients with disease recurrence (REC) or remission (REM). Statistics was assessed by Wilcoxon test.
