# Supplementary material for: Structural robustness of the gut mucosal microbiota is associated with Crohn's disease remission after surgery
Source: PubMed Central journal article supplement — Gut. 2015 Dec 1;65(6):954–62. doi: 10.1136/gutjnl-2015-309184 (PMC4893116; doi:10.1136/gutjnl-2015-309184), 2015-12-01
Supplement: gutjnl-2015-309184-s5.pdf [file gutjnl-2015-309184-s5.pdf]

| Cluster | Cluster p-value      | OTUs | Total | pos75 | pos50 | neg50 | neg75 | Phylum        | Species                             | Similarity (%) |
|---------|----------------------|------|-------|-------|-------|-------|-------|---------------|-------------------------------------|----------------|
| 1       | 5.29e <sup>-10</sup> | 207  | 45    | 3     | 29    | 12    | 1     | Firmicutes    | <i>Faecalibacterium prausnitzii</i> | 96.7           |
|         |                      | 5    | 38    | 4     | 21    | 12    | 1     | Firmicutes    | <i>Ruminococcus bromii</i>          | 99.8           |
|         |                      | 144  | 36    | 2     | 30    | 4     | 0     | Firmicutes    | <i>Faecalibacterium prausnitzii</i> | 98.9           |
|         |                      | 18   | 33    | 0     | 13    | 16    | 3     | Firmicutes    | <i>Clostridium hylemonae</i>        | 98.5           |
|         |                      | 129  | 32    | 1     | 30    | 1     | 0     | Firmicutes    | <i>Ruminococcus schinkii</i>        | 96.7           |
|         |                      | 239  | 30    | 2     | 23    | 5     | 0     | Bacteroidetes | <i>Bacteroides plebeius</i>         | 100            |
|         |                      | 6    | 30    | 2     | 22    | 4     | 1     | Firmicutes    | <i>Faecalibacterium prausnitzii</i> | 98.8           |
|         |                      | 1    | 29    | 1     | 21    | 6     | 0     | Bacteroidetes | <i>Bacteroides plebeius</i>         | 100            |
|         |                      | 45   | 29    | 4     | 22    | 2     | 0     | Bacteroidetes | <i>Bacteroides massiliensis</i>     | 100            |
|         |                      | 152  | 28    | 0     | 24    | 4     | 0     | Firmicutes    | <i>Faecalibacterium prausnitzii</i> | 89             |
|         |                      | 210  | 28    | 0     | 22    | 6     | 0     | Firmicutes    | <i>Ruminococcus bromii</i>          | 94.5           |
|         |                      | 171  | 26    | 0     | 22    | 4     | 0     | Firmicutes    | <i>Coprococcus catus</i>            | 95.3           |
|         |                      | 175  | 26    | 0     | 23    | 3     | 0     | Bacteroidetes | <i>Bacteroides dorei</i>            | 95.3           |
|         |                      | 260  | 26    | 1     | 22    | 3     | 0     | Bacteroidetes | <i>Bacteroides massiliensis</i>     | 99.6           |
|         |                      | 312  | 25    | 1     | 23    | 1     | 0     | Bacteroidetes | <i>Bacteroides nordii</i>           | 99.7           |
|         |                      | 112  | 23    | 0     | 16    | 7     | 0     | Firmicutes    | <i>Faecalibacterium prausnitzii</i> | 100            |
|         |                      | 146  | 23    | 0     | 20    | 3     | 0     | Firmicutes    | <i>Clostridium viride</i>           | 92.7           |
|         |                      | 315  | 20    | 0     | 19    | 1     | 0     | Bacteroidetes | <i>Bacteroides massiliensis</i>     | 100            |
|         |                      | 286  | 19    | 0     | 17    | 2     | 0     | Bacteroidetes | <i>Bacteroides massiliensis</i>     | 100            |
|         |                      | 134  | 18    | 0     | 15    | 3     | 0     | Bacteroidetes | <i>Bacteroides nordii</i>           | 99.4           |
|         |                      | 195  | 18    | 0     | 17    | 1     | 0     | Firmicutes    | <i>Faecalibacterium prausnitzii</i> | 98.8           |
|         |                      | 244  | 18    | 0     | 17    | 1     | 0     | Firmicutes    | <i>Faecalibacterium prausnitzii</i> | 91.6           |
|         |                      | 59   | 18    | 0     | 11    | 7     | 0     | Firmicutes    | <i>Faecalibacterium prausnitzii</i> | 98.8           |
|         |                      | 246  | 17    | 0     | 14    | 3     | 0     | Firmicutes    | <i>Blautia wexlerae</i>             | 93.9           |
|         |                      | 309  | 17    | 0     | 16    | 1     | 0     | Firmicutes    | <i>Ruminococcus bromii</i>          | 94.2           |
|         |                      | 69   | 17    | 0     | 10    | 7     | 0     | Firmicutes    | <i>Blautia glucerasea</i>           | 100            |
|         |                      | 250  | 16    | 0     | 6     | 10    | 0     | Firmicutes    | <i>Staphylococcus warneri</i>       | 100            |
|         |                      | 281  | 16    | 0     | 7     | 8     | 0     | Firmicutes    | <i>Clostridium hylemonae</i>        | 99.2           |
|         |                      | 323  | 16    | 0     | 15    | 1     | 0     | Firmicutes    | <i>Clostridium populeti</i>         | 97.5           |
|         |                      | 229  | 15    | 0     | 15    | 0     | 0     | Firmicutes    | <i>Ruminococcus torques</i>         | 97.6           |
|         |                      | 317  | 15    | 2     | 9     | 4     | 0     | Firmicutes    | <i>Ruminococcus gnavus</i>          | 99.8           |
|         |                      | 34   | 14    | 1     | 11    | 2     | 0     | Firmicutes    | <i>Ruminococcus lactaris</i>        | 96.4           |

|          |                            |            |    |   |    |    |   |                |                                      |      |
|----------|----------------------------|------------|----|---|----|----|---|----------------|--------------------------------------|------|
|          |                            | <b>0</b>   | 13 | 2 | 6  | 5  | 0 | Firmicutes     | <i>Ruminococcus gnavus</i>           | 100  |
|          |                            | <b>117</b> | 11 | 0 | 4  | 6  | 0 | Bacteroidetes  | <i>Parabacteroides merdae</i>        | 100  |
|          |                            | <b>237</b> | 11 | 0 | 3  | 8  | 0 | Bacteroidetes  | <i>Bacteroides coprocola</i>         | 99.8 |
|          |                            | <b>325</b> | 11 | 2 | 7  | 2  | 0 | Firmicutes     | <i>Ruminococcus gnavus</i>           | 100  |
|          |                            | <b>31</b>  | 8  | 0 | 4  | 4  | 0 | Proteobacteria | <i>Escherichia/Shigella flexneri</i> | 99.8 |
|          |                            | <b>125</b> | 7  | 0 | 3  | 4  | 0 | Bacteroidetes  | <i>Barnesiella intestinhominis</i>   | 99   |
|          |                            | <b>65</b>  | 7  | 0 | 6  | 1  | 0 | Firmicutes     | <i>Oscillibacter valericigenes</i>   | 94.5 |
|          |                            | <b>80</b>  | 7  | 0 | 4  | 3  | 0 | Firmicutes     | <i>Eubacterium ramulus</i>           | 99.8 |
|          |                            | <b>296</b> | 6  | 0 | 4  | 2  | 0 | Firmicutes     | <i>Roseburia intestinalis</i>        | 99.7 |
|          |                            | <b>49</b>  | 6  | 0 | 4  | 2  | 0 | Firmicutes     | <i>Roseburia inulinivorans</i>       | 99.6 |
|          |                            | <b>54</b>  | 5  | 0 | 5  | 0  | 0 | Firmicutes     | <i>Clostridium orbiscindens</i>      | 95.9 |
|          |                            | <b>132</b> | 4  | 0 | 3  | 1  | 0 | Firmicutes     | <i>Ruminococcus callidus</i>         | 99.5 |
|          |                            | <b>99</b>  | 4  | 0 | 3  | 1  | 0 | Firmicutes     | <i>Clostridium asparagiforme</i>     | 95.6 |
|          |                            | <b>158</b> | 2  | 0 | 1  | 1  | 0 | Firmicutes     | <i>Megamonas funiformis</i>          | 99.7 |
|          |                            | <b>43</b>  | 2  | 0 | 1  | 1  | 0 | Firmicutes     | <i>Desulfotomaculum guttoideum</i>   | 97.3 |
|          |                            | <b>61</b>  | 2  | 0 | 2  | 0  | 0 | Firmicutes     | <i>Faecalibacterium prausnitzii</i>  | 98.8 |
|          |                            | <b>166</b> | 1  | 0 | 1  | 0  | 0 | Firmicutes     | <i>Blautia luti</i>                  | 98.6 |
|          |                            | <b>187</b> | 1  | 0 | 0  | 1  | 0 | Firmicutes     | <i>Ruminococcus lactaris</i>         | 96.4 |
|          |                            | <b>225</b> | 1  | 0 | 0  | 1  | 0 | NA             | <i>Insolitispirillum peregrinum</i>  | 82.5 |
|          |                            | <b>267</b> | 1  | 0 | 0  | 1  | 0 | Bacteroidetes  | <i>Bacteroides thetaiotaomicron</i>  | 90.1 |
|          |                            | <b>33</b>  | 1  | 0 | 1  | 0  | 0 | Bacteroidetes  | <i>Alistipes onderdonkii</i>         | 97.1 |
| <b>2</b> | <b>1.26e<sup>-07</sup></b> | <b>24</b>  | 26 | 1 | 16 | 8  | 0 | Firmicutes     | <i>Dorea formicigenerans</i>         | 100  |
|          |                            | <b>53</b>  | 26 | 3 | 15 | 8  | 0 | Proteobacteria | <i>Sutterella wadsworthensis</i>     | 100  |
|          |                            | <b>7</b>   | 25 | 2 | 13 | 9  | 0 | Bacteroidetes  | <i>Bacteroides uniformis</i>         | 100  |
|          |                            | <b>98</b>  | 23 | 3 | 12 | 6  | 0 | Firmicutes     | <i>Anaerostipes butyraticus</i>      | 97.6 |
|          |                            | <b>204</b> | 22 | 4 | 14 | 4  | 0 | Bacteroidetes  | <i>Bacteroides dorei</i>             | 98.4 |
|          |                            | <b>12</b>  | 21 | 3 | 12 | 6  | 0 | Firmicutes     | <i>Dorea longicatena</i>             | 100  |
|          |                            | <b>36</b>  | 21 | 0 | 6  | 15 | 0 | Actinobacteria | <i>Bifidobacterium longum</i>        | 98.8 |
|          |                            | <b>177</b> | 20 | 2 | 14 | 4  | 0 | Bacteroidetes  | <i>Bacteroides dorei</i>             | 98.6 |
|          |                            | <b>241</b> | 20 | 0 | 16 | 4  | 0 | Firmicutes     | <i>Desulfotomaculum guttoideum</i>   | 97.7 |
|          |                            | <b>162</b> | 19 | 0 | 8  | 10 | 0 | Bacteroidetes  | <i>Bacteroides chinchillae</i>       | 99.5 |
|          |                            | <b>29</b>  | 19 | 3 | 14 | 2  | 0 | Bacteroidetes  | <i>Parabacteroides distasonis</i>    | 98.3 |
|          |                            | <b>101</b> | 17 | 3 | 11 | 3  | 0 | Bacteroidetes  | <i>Bacteroides dorei</i>             | 99   |

|          |                            |            |    |   |    |    |   |                |                                         |      |
|----------|----------------------------|------------|----|---|----|----|---|----------------|-----------------------------------------|------|
|          |                            | <b>115</b> | 16 | 0 | 6  | 9  | 0 | Bacteroidetes  | <i>Bacteroides chinchillae</i>          | 100  |
|          |                            | <b>153</b> | 16 | 1 | 12 | 3  | 0 | Firmicutes     | <i>Clostridium bolteae</i>              | 95.3 |
|          |                            | <b>14</b>  | 13 | 0 | 8  | 5  | 0 | Bacteroidetes  | <i>Bacteroides dorei</i>                | 98.6 |
|          |                            | <b>16</b>  | 12 | 1 | 11 | 0  | 0 | Firmicutes     | <i>Ruminococcus torques</i>             | 100  |
|          |                            | <b>41</b>  | 12 | 2 | 4  | 6  | 0 | Firmicutes     | <i>Desulfotomaculum guttoideum</i>      | 95.9 |
|          |                            | <b>126</b> | 11 | 0 | 10 | 1  | 0 | Firmicutes     | <i>Clostridium glycyrrhizinilyticum</i> | 97.5 |
|          |                            | <b>288</b> | 11 | 0 | 10 | 1  | 0 | Bacteroidetes  | <i>Bacteroides dorei</i>                | 98.8 |
|          |                            | <b>155</b> | 10 | 0 | 9  | 0  | 0 | Firmicutes     | <i>Desulfotomaculum guttoideum</i>      | 96.8 |
|          |                            | <b>176</b> | 9  | 0 | 5  | 4  | 0 | Proteobacteria | <i>Acinetobacter johnsonii</i>          | 99   |
|          |                            | <b>243</b> | 8  | 0 | 3  | 5  | 0 | Proteobacteria | <i>Pseudomonas flavescens</i>           | 100  |
|          |                            | <b>304</b> | 8  | 0 | 5  | 3  | 0 | Firmicutes     | <i>Dorea longicatena</i>                | 100  |
|          |                            | <b>10</b>  | 7  | 0 | 4  | 3  | 0 | Firmicutes     | <i>Clostridium nexile</i>               | 99.8 |
|          |                            | <b>270</b> | 7  | 0 | 7  | 0  | 0 | Bacteroidetes  | <i>Bacteroides dorei</i>                | 98.8 |
|          |                            | <b>259</b> | 5  | 0 | 5  | 0  | 0 | Firmicutes     | <i>Clostridium hylemonae</i>            | 97.1 |
|          |                            | <b>89</b>  | 5  | 0 | 3  | 2  | 0 | Actinobacteria | <i>Bifidobacterium adolescentis</i>     | 100  |
|          |                            | <b>93</b>  | 4  | 0 | 3  | 1  | 0 | Bacteroidetes  | <i>Bacteroides acidifaciens</i>         | 95.9 |
|          |                            | <b>120</b> | 3  | 0 | 2  | 1  | 0 | Proteobacteria | <i>Acinetobacter lwoffii</i>            | 100  |
|          |                            | <b>188</b> | 3  | 0 | 0  | 3  | 0 | Firmicutes     | <i>Anaerostipes caccae</i>              | 99.8 |
|          |                            | <b>245</b> | 3  | 0 | 2  | 1  | 0 | Firmicutes     | <i>Anoxybacillus rupiensis</i>          | 100  |
|          |                            | <b>258</b> | 3  | 0 | 3  | 0  | 0 | Firmicutes     | <i>Desulfotomaculum guttoideum</i>      | 96.9 |
|          |                            | <b>305</b> | 3  | 0 | 1  | 2  | 0 | Bacteroidetes  | <i>Sphingobacterium multivorum</i>      | 99.7 |
|          |                            | <b>86</b>  | 3  | 0 | 3  | 0  | 0 | Firmicutes     | <i>Clostridium lactatifermentans</i>    | 93.5 |
|          |                            | <b>247</b> | 1  | 0 | 0  | 1  | 0 | Firmicutes     | <i>Lactobacillus delbrueckii</i>        | 100  |
| <b>3</b> | <b>5.86e<sup>-05</sup></b> | <b>2</b>   | 24 | 1 | 19 | 4  | 0 | Firmicutes     | <i>Eubacterium rectale</i>              | 99.7 |
|          |                            | <b>199</b> | 18 | 0 | 12 | 6  | 0 | Firmicutes     | <i>Ruminococcus schinkii</i>            | 96.6 |
|          |                            | <b>151</b> | 17 | 1 | 9  | 7  | 0 | Firmicutes     | <i>Ruminococcus obeum</i>               | 100  |
|          |                            | <b>25</b>  | 16 | 1 | 5  | 10 | 0 | Fusobacteria   | <i>Fusobacterium mortiferum</i>         | 98.6 |
|          |                            | <b>138</b> | 14 | 1 | 9  | 4  | 0 | Bacteroidetes  | <i>Alistipes shahii</i>                 | 99.8 |
|          |                            | <b>19</b>  | 13 | 0 | 7  | 6  | 0 | Firmicutes     | <i>Ruminococcus albus</i>               | 95.7 |
|          |                            | <b>131</b> | 12 | 0 | 7  | 5  | 0 | Firmicutes     | <i>Roseburia faecis</i>                 | 99.7 |
|          |                            | <b>30</b>  | 12 | 0 | 11 | 1  | 0 | Firmicutes     | <i>Clostridium orbiscindens</i>         | 100  |
|          |                            | <b>9</b>   | 12 | 1 | 8  | 2  | 1 | Firmicutes     | <i>Blautia wexlerae</i>                 | 99.8 |
|          |                            | <b>336</b> | 11 | 0 | 10 | 1  | 0 | Firmicutes     | <i>Clostridium orbiscindens</i>         | 99.8 |

|          |                            |            |    |   |    |   |   |                |                                      |      |
|----------|----------------------------|------------|----|---|----|---|---|----------------|--------------------------------------|------|
|          |                            | <b>38</b>  | 11 | 0 | 10 | 1 | 0 | Firmicutes     | <i>Clostridium bolteae</i>           | 99.5 |
|          |                            | <b>4</b>   | 9  | 1 | 5  | 3 | 0 | Bacteroidetes  | <i>Bacteroides fragilis</i>          | 98.6 |
|          |                            | <b>116</b> | 8  | 0 | 7  | 1 | 0 | Firmicutes     | <i>Clostridium populeti</i>          | 94.5 |
|          |                            | <b>87</b>  | 8  | 0 | 3  | 4 | 1 | Firmicutes     | <i>Clostridium lituseburense</i>     | 98   |
|          |                            | <b>106</b> | 7  | 0 | 6  | 1 | 0 | Firmicutes     | <i>Eubacterium desmolans</i>         | 98.2 |
|          |                            | <b>142</b> | 6  | 0 | 3  | 3 | 0 | Firmicutes     | <i>Granulicatella elegans</i>        | 100  |
|          |                            | <b>159</b> | 6  | 0 | 1  | 5 | 0 | Firmicutes     | <i>Alicyclobacillus pohliae</i>      | 99   |
|          |                            | <b>3</b>   | 6  | 0 | 3  | 3 | 0 | Bacteroidetes  | <i>Bacteroides stercoris</i>         | 99   |
|          |                            | <b>71</b>  | 6  | 0 | 6  | 0 | 0 | Actinobacteria | <i>Eggerthella lenta</i>             | 99.6 |
|          |                            | <b>77</b>  | 6  | 0 | 5  | 1 | 0 | Firmicutes     | <i>Dialister invisus</i>             | 100  |
|          |                            | <b>274</b> | 5  | 0 | 2  | 3 | 0 | Bacteroidetes  | <i>Bacteroides fragilis</i>          | 99.2 |
|          |                            | <b>255</b> | 4  | 0 | 2  | 2 | 0 | Firmicutes     | <i>Clostridium disporicum</i>        | 99.7 |
|          |                            | <b>51</b>  | 4  | 0 | 3  | 1 | 0 | Firmicutes     | <i>Cellulosilyticum ruminicola</i>   | 92.6 |
|          |                            | <b>73</b>  | 3  | 0 | 3  | 0 | 0 | Bacteroidetes  | <i>Bacteroides eggerthii</i>         | 99.5 |
|          |                            | <b>79</b>  | 3  | 0 | 3  | 0 | 0 | Actinobacteria | <i>Collinsella intestinalis</i>      | 99.5 |
|          |                            | <b>107</b> | 2  | 0 | 0  | 2 | 0 | Proteobacteria | <i>Paracoccus yeei</i>               | 99.5 |
|          |                            | <b>191</b> | 2  | 0 | 1  | 1 | 0 | Firmicutes     | <i>Butyricicoccus pullicaecorum</i>  | 99.6 |
|          |                            | <b>203</b> | 2  | 0 | 1  | 1 | 0 | Firmicutes     | <i>Lactococcus lactis</i>            | 100  |
|          |                            | <b>303</b> | 1  | 0 | 0  | 1 | 0 | Firmicutes     | <i>Acetanaerobacterium elongatum</i> | 92.9 |
|          |                            | <b>84</b>  | 1  | 0 | 0  | 1 | 0 | Bacteroidetes  | <i>Odoribacter splanchnicus</i>      | 99.3 |
| <b>4</b> | <b>2.47e<sup>-06</sup></b> | <b>20</b>  | 17 | 1 | 15 | 1 | 0 | Firmicutes     | <i>Gemmiger formicilis</i>           | 99.8 |
|          |                            | <b>48</b>  | 16 | 1 | 14 | 1 | 0 | Bacteroidetes  | <i>Prevotella amnii</i>              | 84.5 |
|          |                            | <b>104</b> | 14 | 0 | 11 | 3 | 0 | Firmicutes     | <i>Clostridium orbiscindens</i>      | 90.8 |
|          |                            | <b>105</b> | 14 | 0 | 13 | 1 | 0 | Firmicutes     | <i>Dialister succinatiphilus</i>     | 98.7 |
|          |                            | <b>22</b>  | 14 | 0 | 12 | 1 | 0 | Firmicutes     | <i>Clostridium aldenense</i>         | 96.4 |
|          |                            | <b>127</b> | 11 | 0 | 7  | 4 | 0 | Bacteroidetes  | <i>Bacteroides cellulosilyticus</i>  | 99.5 |
|          |                            | <b>161</b> | 11 | 2 | 9  | 0 | 0 | Firmicutes     | <i>Gemmiger formicilis</i>           | 100  |
|          |                            | <b>289</b> | 11 | 0 | 5  | 6 | 0 | Firmicutes     | <i>Clostridium saccharolyticum</i>   | 96.4 |
|          |                            | <b>39</b>  | 11 | 0 | 8  | 3 | 0 | Bacteroidetes  | <i>Prevotella copri</i>              | 99.3 |
|          |                            | <b>240</b> | 9  | 0 | 9  | 0 | 0 | Firmicutes     | <i>Coprococcus eutactus</i>          | 95.4 |
|          |                            | <b>81</b>  | 9  | 0 | 8  | 1 | 0 | Actinobacteria | <i>Slackia piriformis</i>            | 90.4 |
|          |                            | <b>92</b>  | 9  | 0 | 9  | 0 | 0 | Firmicutes     | <i>Coprococcus catus</i>             | 100  |
|          |                            | <b>157</b> | 8  | 0 | 8  | 0 | 0 | Firmicutes     | <i>Eubacterium eligens</i>           | 99.8 |

|          |                           |            |    |   |    |   |   |                     |                                         |      |
|----------|---------------------------|------------|----|---|----|---|---|---------------------|-----------------------------------------|------|
|          |                           | <b>301</b> | 8  | 0 | 2  | 6 | 0 | Firmicutes          | <i>Ruminococcus schinkii</i>            | 96.8 |
|          |                           | <b>47</b>  | 8  | 0 | 8  | 0 | 0 | Firmicutes          | <i>Clostridium lactatifermentans</i>    | 95.2 |
|          |                           | <b>156</b> | 7  | 0 | 6  | 1 | 0 | Proteobacteria      | <i>Sutterella stercoricanis</i>         | 99.6 |
|          |                           | <b>291</b> | 5  | 0 | 5  | 0 | 0 | NA                  | <i>Rhodospirillum rubrum</i>            | 87.7 |
|          |                           | <b>90</b>  | 5  | 0 | 5  | 0 | 0 | Proteobacteria      | <i>Sutterella stercoricanis</i>         | 99   |
|          |                           | <b>249</b> | 4  | 0 | 3  | 0 | 0 | Firmicutes          | <i>Allisonella histaminiformans</i>     | 98.1 |
|          |                           | <b>37</b>  | 4  | 0 | 3  | 1 | 0 | Firmicutes          | <i>Eubacterium hallii</i>               | 99.7 |
|          |                           | <b>44</b>  | 4  | 0 | 2  | 2 | 0 | Firmicutes          | <i>Gemmiger formicilis</i>              | 97.6 |
|          |                           | <b>220</b> | 3  | 0 | 3  | 0 | 0 | Proteobacteria      | <i>Klebsiella pneumoniae</i>            | 100  |
|          |                           | <b>242</b> | 3  | 0 | 3  | 0 | 0 | Firmicutes          | <i>Lactobacillus taiwanensis</i>        | 100  |
|          |                           | <b>110</b> | 1  | 0 | 1  | 0 | 0 | Firmicutes          | <i>Mogibacterium pumilum</i>            | 92.3 |
|          |                           | <b>50</b>  | 1  | 0 | 1  | 0 | 0 | Firmicutes          | <i>Lactobacillus rogosae</i>            | 99.8 |
|          |                           | <b>55</b>  | 1  | 0 | 1  | 0 | 0 | Proteobacteria      | <i>Methylobacterium adhaesivum</i>      | 98.9 |
|          |                           | <b>63</b>  | 1  | 0 | 1  | 0 | 0 | Actinobacteria      | <i>Collinsella aerofaciens</i>          | 99   |
|          |                           | <b>70</b>  | 1  | 0 | 1  | 0 | 0 | Firmicutes          | <i>Sporobacter termitidis</i>           | 94.1 |
|          |                           | <b>83</b>  | 1  | 0 | 1  | 0 | 0 | NA                  | <i>Desulfotomaculum carboxydivorans</i> | 86.7 |
|          |                           | <b>96</b>  | 1  | 0 | 0  | 1 | 0 | Firmicutes          | <i>Gemmiger formicilis</i>              | 93.8 |
| <b>5</b> | <b>1.91e<sup>-4</sup></b> | <b>60</b>  | 18 | 0 | 12 | 6 | 0 | Firmicutes          | <i>Clostridium ramosum</i>              | 99.8 |
|          |                           | <b>76</b>  | 18 | 0 | 15 | 3 | 0 | Proteobacteria      | <i>Mesorhizobium australicum</i>        | 98.8 |
|          |                           | <b>91</b>  | 12 | 0 | 11 | 1 | 0 | Deinococcus-Thermus | <i>Thermus scotoductus</i>              | 99.5 |
|          |                           | <b>58</b>  | 10 | 1 | 9  | 0 | 0 | Proteobacteria      | <i>Undibacterium oligocarboniphilum</i> | 100  |
|          |                           | <b>139</b> | 9  | 0 | 8  | 1 | 0 | Bacteroidetes       | <i>Prevotella enoeca</i>                | 83.3 |
|          |                           | <b>224</b> | 8  | 0 | 8  | 0 | 0 | Proteobacteria      | <i>Bradyrhizobium yuanmingense</i>      | 99.5 |
|          |                           | <b>23</b>  | 8  | 0 | 6  | 2 | 0 | Firmicutes          | <i>Streptococcus salivarius</i>         | 100  |
|          |                           | <b>108</b> | 7  | 0 | 7  | 0 | 0 | Proteobacteria      | <i>Pelomonas saccharophila</i>          | 99   |
|          |                           | <b>11</b>  | 7  | 0 | 6  | 1 | 0 | Firmicutes          | <i>Thermanaeromonas toyohensis</i>      | 85.9 |
|          |                           | <b>227</b> | 7  | 0 | 6  | 1 | 0 | Bacteroidetes       | <i>Sediminibacterium salmoneum</i>      | 96   |
|          |                           | <b>28</b>  | 7  | 1 | 5  | 1 | 0 | Firmicutes          | <i>Streptococcus mitis</i>              | 100  |
|          |                           | <b>46</b>  | 7  | 0 | 5  | 2 | 0 | Firmicutes          | <i>Blautia hansenii</i>                 | 99.8 |
|          |                           | <b>68</b>  | 7  | 1 | 5  | 1 | 0 | Proteobacteria      | <i>Sphingomonas melonis</i>             | 99.8 |
|          |                           | <b>64</b>  | 6  | 1 | 4  | 1 | 0 | Firmicutes          | <i>Gemella haemolysans</i>              | 99.8 |
|          |                           | <b>124</b> | 5  | 0 | 4  | 0 | 0 | Firmicutes          | <i>Granulicatella adiacens</i>          | 100  |
|          |                           | <b>264</b> | 5  | 0 | 5  | 0 | 0 | Actinobacteria      | <i>Actinomyces odontolyticus</i>        | 100  |

|           |           |            |    |   |    |   |   |                |                                     |      |
|-----------|-----------|------------|----|---|----|---|---|----------------|-------------------------------------|------|
|           |           | <b>123</b> | 4  | 0 | 0  | 3 | 0 | Firmicutes     | <i>Clostridium hylemonae</i>        | 97.5 |
|           |           | <b>143</b> | 4  | 0 | 3  | 1 | 0 | Bacteroidetes  | <i>Lishizhenia tianjinensis</i>     | 86.9 |
|           |           | <b>154</b> | 4  | 0 | 3  | 1 | 0 | Proteobacteria | <i>Ralstonia insidiosa</i>          | 99.7 |
|           |           | <b>205</b> | 4  | 0 | 3  | 1 | 0 | Proteobacteria | <i>Comamonas aquatica</i>           | 98.7 |
|           |           | <b>178</b> | 3  | 0 | 2  | 1 | 0 | Actinobacteria | <i>Atopobium rimae</i>              | 100  |
|           |           | <b>163</b> | 2  | 0 | 2  | 0 | 0 | Firmicutes     | <i>Streptococcus sinensis</i>       | 98.8 |
|           |           | <b>57</b>  | 2  | 0 | 2  | 0 | 0 | Firmicutes     | <i>Clostridium perfringens</i>      | 100  |
|           |           | <b>74</b>  | 2  | 0 | 2  | 0 | 0 | Firmicutes     | <i>Clostridium leptum</i>           | 95.2 |
|           |           | <b>130</b> | 1  | 0 | 1  | 0 | 0 | Proteobacteria | <i>Brevundimonas vesicularis</i>    | 100  |
|           |           | <b>226</b> | 1  | 0 | 1  | 0 | 0 | Bacteroidetes  | <i>Sediminibacterium salmoneum</i>  | 98.1 |
| <b>ND</b> | <b>ND</b> | <b>67</b>  | 26 | 3 | 15 | 8 | 0 | Bacteroidetes  | <i>Bacteroides caccae</i>           | 99.8 |
| <b>ND</b> | <b>ND</b> | <b>230</b> | 23 | 0 | 14 | 8 | 0 | Bacteroidetes  | <i>Bacteroides xylanisolvens</i>    | 99.8 |
| <b>ND</b> | <b>ND</b> | <b>56</b>  | 20 | 1 | 14 | 5 | 0 | Bacteroidetes  | <i>Bacteroides nordii</i>           | 99.7 |
| <b>ND</b> | <b>ND</b> | <b>21</b>  | 17 | 0 | 12 | 5 | 0 | Bacteroidetes  | <i>Bacteroides caccae</i>           | 100  |
| <b>ND</b> | <b>ND</b> | <b>32</b>  | 15 | 2 | 12 | 1 | 0 | Bacteroidetes  | <i>Bacteroides thetaiotaomicron</i> | 100  |
| <b>ND</b> | <b>ND</b> | <b>327</b> | 15 | 1 | 11 | 3 | 0 | Bacteroidetes  | <i>Bacteroides nordii</i>           | 99.5 |
| <b>ND</b> | <b>ND</b> | <b>13</b>  | 14 | 1 | 11 | 2 | 0 | Firmicutes     | <i>Clostridium bolteae</i>          | 100  |
| <b>ND</b> | <b>ND</b> | <b>223</b> | 14 | 0 | 7  | 7 | 0 | Actinobacteria | <i>Collinsella aerofaciens</i>      | 100  |
| <b>ND</b> | <b>ND</b> | <b>8</b>   | 13 | 0 | 10 | 3 | 0 | Firmicutes     | <i>Blautia glucerasea</i>           | 98.8 |
| <b>ND</b> | <b>ND</b> | <b>208</b> | 12 | 0 | 10 | 2 | 0 | Bacteroidetes  | <i>Butyricimonas virosa</i>         | 98.3 |
| <b>ND</b> | <b>ND</b> | <b>94</b>  | 10 | 0 | 10 | 0 | 0 | Firmicutes     | <i>Clostridium scindens</i>         | 100  |
| <b>ND</b> | <b>ND</b> | <b>82</b>  | 8  | 0 | 7  | 1 | 0 | Firmicutes     | <i>Blautia hansenii</i>             | 100  |
| <b>ND</b> | <b>ND</b> | <b>97</b>  | 8  | 0 | 7  | 1 | 0 | Proteobacteria | <i>Bilophila wadsworthia</i>        | 99.7 |
| <b>ND</b> | <b>ND</b> | <b>145</b> | 5  | 0 | 5  | 0 | 0 | Firmicutes     | <i>Clostridium aldenense</i>        | 98   |
| <b>ND</b> | <b>ND</b> | <b>169</b> | 3  | 0 | 3  | 0 | 0 | Firmicutes     | <i>Ruminococcus obeum</i>           | 99.8 |
| <b>ND</b> | <b>ND</b> | <b>277</b> | 3  | 0 | 1  | 2 | 0 | NA             | <i>Bacteroides plebeius</i>         | 90.7 |
| <b>ND</b> | <b>ND</b> | <b>251</b> | 2  | 0 | 1  | 1 | 0 | Actinobacteria | <i>Bifidobacterium breve</i>        | 100  |
| <b>ND</b> | <b>ND</b> | <b>307</b> | 1  | 0 | 1  | 0 | 0 | Firmicutes     | <i>Veillonella parvula</i>          | 99.8 |

**Supp. Table 4: OTU correlation network composition deduced from patients in remission 6 months after ICR**

Cluster: Identity of the cluster; OTUs: identity of the Operational Taxonomic Unit specific of each cluster; Total: total number of significant correlations between the identified OTU and other OTUs from the cluster; pos75: number of significant positive correlations ( $R \geq 0.75$ ) between the identified OTU and other OTUs from the cluster; pos50: number of significant positive correlations ( $R \geq 0.50$ ) between the identified OTU and other OTUs from the cluster; neg50: number of significant negative correlations ( $R \leq -0.5$ ) between the identified OTU and other OTUs from

the cluster; Similarity: similarity percentage between the OTU and the first relative species. No significant negative correlation with  $R \leq -0.75$  was observed.
