# Supplementary material for: Structural robustness of the gut mucosal microbiota is associated with Crohn's disease remission after surgery
Source: PubMed Central journal article supplement — Gut. 2015 Dec 1;65(6):954–62. doi: 10.1136/gutjnl-2015-309184 (PMC4893116; doi:10.1136/gutjnl-2015-309184), 2015-12-01
Supplement: gutjnl-2015-309184-s7.pdf [file gutjnl-2015-309184-s7.pdf]

| OTUs | Total | pos75 | pos50 | neg50 | neg75 | Phylum         | Species                              | Similarity (%) |
|------|-------|-------|-------|-------|-------|----------------|--------------------------------------|----------------|
| 0    | 1     | 1     | 0     | 0     | 0     | Firmicutes     | <i>Ruminococcus gnavus</i>           | 100            |
| 101  | 2     | 2     | 0     | 0     | 0     | Bacteroidetes  | <i>Bacteroides dorei</i>             | 99             |
| 130  | 1     | 1     | 0     | 0     | 0     | Proteobacteria | <i>Brevundimonas vesicularis</i>     | 100            |
| 177  | 2     | 1     | 1     | 0     | 0     | Bacteroidetes  | <i>Bacteroides dorei</i>             | 98.6           |
| 180  | 1     | 0     | 1     | 0     | 0     | Firmicutes     | <i>Clostridium spiroforme</i>        | 92.7           |
| 204  | 2     | 2     | 0     | 0     | 0     | Bacteroidetes  | <i>Bacteroides dorei</i>             | 98.4           |
| 226  | 2     | 1     | 0     | 1     | 0     | Bacteroidetes  | <i>Sediminibacterium salmoneum</i>   | 98.1           |
| 24   | 1     | 1     | 0     | 0     | 0     | Firmicutes     | <i>Dorea formicigenerans</i>         | 100            |
| 270  | 3     | 3     | 0     | 0     | 0     | Bacteroidetes  | <i>Bacteroides dorei</i>             | 98.8           |
| 28   | 1     | 0     | 0     | 1     | 0     | Firmicutes     | <i>Streptococcus mitis</i>           | 100            |
| 289  | 4     | 0     | 2     | 2     | 0     | Firmicutes     | <i>Clostridium saccharolyticum</i>   | 96.4           |
| 310  | 2     | 2     | 0     | 0     | 0     | NA             | <i>Escherichia/Shigella flexneri</i> | 92.6           |
| 49   | 3     | 0     | 3     | 0     | 0     | Firmicutes     | <i>Roseburia inulinivorans</i>       | 99.6           |
| 53   | 1     | 0     | 1     | 0     | 0     | Proteobacteria | <i>Sutterella wadsworthensis</i>     | 100            |
| 84   | 1     | 0     | 1     | 0     | 0     | Bacteroidetes  | <i>Odoribacter splanchnicus</i>      | 99.3           |

**Supp. Table 6: OTU correlation network composition deduced from patients at time of surgery**

Cluster: Identity of the cluster; OTUs: identity of the Operational Taxonomic Unit specific of each cluster; Total: total number of significant correlations between the identified OTU and other OTUs from the cluster; pos75: number of significant positive correlations ( $R \geq 0.75$ ) between the identified OTU and other OTUs from the cluster; pos50: number of significant positive correlations ( $R \geq 0.50$ ) between the identified OTU and other OTUs from the cluster; neg50: number of significant negative correlations ( $R \leq -0.5$ ) between the identified OTU and other OTUs from the cluster; Similarity: similarity percentage between the OTU and the first relative species. No significant negative correlation with  $R \leq -0.75$  was observed.
