# Supplementary material for: Structural robustness of the gut mucosal microbiota is associated with Crohn's disease remission after surgery
Source: HighWire-hosted journal article supplement (doi:10.1136/gutjnl-2015-309184), 2015-12-01
Supplement: gutjnl-2015-309184supp_table1.pdf [file gutjnl-2015-309184supp_table1.pdf]

| Patients | Age | Sex | Samples at M0 |       | Samples at M6 |     |       | Endoscopic status at M6 |
|----------|-----|-----|---------------|-------|---------------|-----|-------|-------------------------|
|          |     |     | Ileum         | Feces | Sus           | Sub | Feces |                         |
| <b>B</b> | NA  | F   | x             | x     | x             | x   | x     | REM                     |
| <b>D</b> | 26  | F   |               | x     | x             | x   | x     | REM                     |
| <b>F</b> | 33  | M   | x             | x     | x             | x   | x     | REM                     |
| <b>G</b> | 28  | F   | x             | x     | x             | x   | x     | REM                     |
| <b>J</b> | NA  | M   |               | x     | x             | x   | x     | REM                     |
| <b>A</b> | NA  | F   | x             |       | x             | x   |       | REC                     |
| <b>C</b> | 31  | F   |               | x     | x             | x   | x     | REC                     |
| <b>E</b> | 39  | M   | x             | x     | x             | x   | x     | REC                     |
| <b>H</b> | 27  | F   | x             | x     | x             | x   | x     | REC                     |
| <b>I</b> | NA  | M   |               | x     | x             | x   | x     | REC                     |
| <b>K</b> | 25  | F   |               | x     |               |     | x     | REC                     |

**Supp. Table 1: Characteristics of patients and samples analysed by 16S rRNA gene sequencing**

F: female. M: male. M0: time of surgery; M6: 6 month after surgery; Ileum: ileal biopsy sampled on to the resected tissue at M0. Sus: neoterminal ileum biopsy at M6. Sub: subanastomotic colon biopsy at M6. REM or REC: endoscopic remission (REM) or relapse (REC) six months after surgery. NA: Not available.
