# Supplementary material for: Structural robustness of the gut mucosal microbiota is associated with Crohn's disease remission after surgery
Source: HighWire-hosted journal article supplement (doi:10.1136/gutjnl-2015-309184), 2015-12-01
Supplement: gutjnl-2015-309184supp_table5.pdf [file gutjnl-2015-309184supp_table5.pdf]

| Cluster  | Cluster p-value            | OTUs       | Total | pos75 | pos50 | neg50 | neg75 | Phylum              | Species                              | Similarity (%) |
|----------|----------------------------|------------|-------|-------|-------|-------|-------|---------------------|--------------------------------------|----------------|
| <b>1</b> | <b>0.0107</b>              | <b>28</b>  | 5     | 2     | 3     | 0     | 0     | Firmicutes          | <i>Streptococcus mitis</i>           | 100            |
|          |                            | <b>163</b> | 4     | 0     | 3     | 1     | 0     | Firmicutes          | <i>Streptococcus sinensis</i>        | 98.8           |
|          |                            | <b>64</b>  | 4     | 1     | 3     | 0     | 0     | Firmicutes          | <i>Gemella haemolysans</i>           | 99.8           |
|          |                            | <b>124</b> | 2     | 1     | 1     | 0     | 0     | Firmicutes          | <i>Granulicatella adiacens</i>       | 100            |
|          |                            | <b>176</b> | 2     | 0     | 2     | 0     | 0     | Proteobacteria      | <i>Acinetobacter johnsonii</i>       | 99             |
|          |                            | <b>227</b> | 1     | 0     | 1     | 0     | 0     | Bacteroidetes       | <i>Sediminibacterium salmoneum</i>   | 96             |
|          |                            | <b>264</b> | 1     | 0     | 1     | 0     | 0     | Actinobacteria      | <i>Actinomyces odontolyticus</i>     | 100            |
| <b>2</b> | <b>5.27e<sup>-04</sup></b> | <b>205</b> | 6     | 2     | 4     | 0     | 0     | Proteobacteria      | <i>Comamonas aquatica</i>            | 98.7           |
|          |                            | <b>5</b>   | 6     | 0     | 5     | 1     | 0     | Firmicutes          | <i>Ruminococcus bromii</i>           | 99.8           |
|          |                            | <b>108</b> | 5     | 3     | 2     | 0     | 0     | Proteobacteria      | <i>Pelomonas saccharophila</i>       | 99             |
|          |                            | <b>11</b>  | 5     | 2     | 2     | 0     | 1     | Firmicutes          | <i>Thermanaeromonas toyohensis</i>   | 85.9           |
|          |                            | <b>159</b> | 5     | 0     | 5     | 0     | 0     | Firmicutes          | <i>Alicyclobacillus pohliae</i>      | 99             |
|          |                            | <b>154</b> | 4     | 2     | 2     | 0     | 0     | Proteobacteria      | <i>Ralstonia insidiosa</i>           | 99.7           |
|          |                            | <b>76</b>  | 4     | 0     | 4     | 0     | 0     | Proteobacteria      | <i>Mesorhizobium australicum</i>     | 98.8           |
|          |                            | <b>102</b> | 3     | 0     | 3     | 0     | 0     | Firmicutes          | <i>Oscillibacter valericigenes</i>   | 91.9           |
|          |                            | <b>55</b>  | 3     | 0     | 3     | 0     | 0     | Proteobacteria      | <i>Methylobacterium adhaesivum</i>   | 98.9           |
|          |                            | <b>256</b> | 2     | 0     | 2     | 0     | 0     | Proteobacteria      | <i>Rhodospirillum rubrum</i>         | 85.8           |
|          |                            | <b>91</b>  | 2     | 1     | 1     | 0     | 0     | Deinococcus-Thermus | <i>Thermus scotoductus</i>           | 99.5           |
|          |                            | <b>150</b> | 1     | 0     | 1     | 0     | 0     | Proteobacteria      | <i>Methylobacterium adhaesivum</i>   | 98.8           |
|          |                            | <b>287</b> | 1     | 0     | 1     | 0     | 0     | Firmicutes          | <i>Dendrosporobacter quercicolus</i> | 81.2           |
|          |                            | <b>307</b> | 1     | 0     | 1     | 0     | 0     | Firmicutes          | <i>Veillonella parvula</i>           | 99.8           |
| <b>3</b> | <b>1.25e<sup>-06</sup></b> | <b>8</b>   | 13    | 7     | 6     | 0     | 0     | Firmicutes          | <i>Blautia glucerasea</i>            | 98.8           |
|          |                            | <b>18</b>  | 12    | 4     | 7     | 0     | 1     | Firmicutes          | <i>Clostridium hylemonae</i>         | 98.5           |
|          |                            | <b>38</b>  | 12    | 1     | 10    | 1     | 0     | Firmicutes          | <i>Clostridium bolteae</i>           | 99.5           |
|          |                            | <b>103</b> | 10    | 1     | 9     | 0     | 0     | Proteobacteria      | <i>Aeromonas ichthiosmia</i>         | 100            |
|          |                            | <b>193</b> | 10    | 4     | 6     | 0     | 0     | Firmicutes          | <i>Clostridium bartlettii</i>        | 99.5           |
|          |                            | <b>222</b> | 9     | 0     | 8     | 1     | 0     | Firmicutes          | <i>Enterococcus faecalis</i>         | 100            |
|          |                            | <b>281</b> | 9     | 3     | 6     | 0     | 0     | Firmicutes          | <i>Clostridium hylemonae</i>         | 99.2           |
|          |                            | <b>325</b> | 9     | 2     | 7     | 0     | 0     | Firmicutes          | <i>Ruminococcus gnavus</i>           | 100            |
|          |                            | <b>82</b>  | 9     | 2     | 7     | 0     | 0     | Firmicutes          | <i>Blautia hansenii</i>              | 100            |
|          |                            | <b>191</b> | 8     | 0     | 7     | 1     | 0     | Firmicutes          | <i>Butyricicoccus pullicaecorum</i>  | 99.6           |
|          |                            | <b>145</b> | 7     | 1     | 6     | 0     | 0     | Firmicutes          | <i>Clostridium aldenense</i>         | 98             |

|          |                            |            |    |   |   |   |   |                |                                         |      |
|----------|----------------------------|------------|----|---|---|---|---|----------------|-----------------------------------------|------|
|          |                            | <b>188</b> | 6  | 0 | 6 | 0 | 0 | Firmicutes     | <i>Anaerostipes caccae</i>              | 99.8 |
|          |                            | <b>202</b> | 6  | 0 | 6 | 0 | 0 | Bacteroidetes  | <i>Parabacteroides distasonis</i>       | 98.6 |
|          |                            | <b>301</b> | 6  | 3 | 3 | 0 | 0 | Firmicutes     | <i>Ruminococcus schinkii</i>            | 96.8 |
|          |                            | <b>13</b>  | 5  | 0 | 5 | 0 | 0 | Firmicutes     | <i>Clostridium bolteae</i>              | 100  |
|          |                            | <b>23</b>  | 5  | 0 | 4 | 1 | 0 | Firmicutes     | <i>Streptococcus salivarius</i>         | 100  |
|          |                            | <b>6</b>   | 5  | 1 | 0 | 3 | 1 | Firmicutes     | <i>Faecalibacterium prausnitzii</i>     | 98.8 |
|          |                            | <b>85</b>  | 5  | 2 | 3 | 0 | 0 | Firmicutes     | <i>Clostridium bartlettii</i>           | 99.5 |
|          |                            | <b>184</b> | 4  | 0 | 3 | 1 | 0 | Proteobacteria | <i>Proteus vulgaris</i>                 | 99.8 |
|          |                            | <b>317</b> | 4  | 2 | 2 | 0 | 0 | Firmicutes     | <i>Ruminococcus gnavus</i>              | 99.8 |
|          |                            | <b>75</b>  | 4  | 0 | 4 | 0 | 0 | Firmicutes     | <i>Clostridium hylemonae</i>            | 99.2 |
|          |                            | <b>0</b>   | 3  | 1 | 2 | 0 | 0 | Firmicutes     | <i>Ruminococcus gnavus</i>              | 100  |
|          |                            | <b>220</b> | 3  | 0 | 1 | 2 | 0 | Proteobacteria | <i>Klebsiella pneumoniae</i>            | 100  |
|          |                            | <b>29</b>  | 3  | 2 | 1 | 0 | 0 | Bacteroidetes  | <i>Parabacteroides distasonis</i>       | 98.3 |
|          |                            | <b>316</b> | 3  | 0 | 3 | 0 | 0 | Firmicutes     | <i>Clostridium bartlettii</i>           | 99.7 |
|          |                            | <b>40</b>  | 3  | 0 | 3 | 0 | 0 | Firmicutes     | <i>Enterococcus durans</i>              | 100  |
|          |                            | <b>2</b>   | 1  | 1 | 0 | 0 | 0 | Firmicutes     | <i>Eubacterium rectale</i>              | 99.7 |
|          |                            | <b>232</b> | 1  | 0 | 1 | 0 | 0 | Firmicutes     | <i>Phascolarctobacterium faecium</i>    | 100  |
|          |                            | <b>335</b> | 1  | 0 | 1 | 0 | 0 | Firmicutes     | <i>Enterococcus durans</i>              | 100  |
|          |                            | <b>60</b>  | 1  | 0 | 1 | 0 | 0 | Firmicutes     | <i>Clostridium ramosum</i>              | 99.8 |
| <b>4</b> | <b>7.54e<sup>-3</sup></b>  | <b>58</b>  | 7  | 1 | 4 | 2 | 0 | Proteobacteria | <i>Undibacterium oligocarboniphilum</i> | 100  |
|          |                            | <b>139</b> | 4  | 0 | 3 | 0 | 0 | Bacteroidetes  | <i>Prevotella enoeca</i>                | 83.3 |
|          |                            | <b>258</b> | 4  | 0 | 2 | 2 | 0 | Firmicutes     | <i>Desulfotomaculum guttoideum</i>      | 96.9 |
|          |                            | <b>68</b>  | 4  | 1 | 3 | 0 | 0 | Proteobacteria | <i>Sphingomonas melonis</i>             | 99.8 |
|          |                            | <b>250</b> | 2  | 0 | 2 | 0 | 0 | Firmicutes     | <i>Staphylococcus warneri</i>           | 100  |
|          |                            | <b>257</b> | 2  | 0 | 2 | 0 | 0 | Firmicutes     | <i>Faecalibacterium prausnitzii</i>     | 95   |
|          |                            | <b>143</b> | 1  | 0 | 1 | 0 | 0 | Bacteroidetes  | <i>Lishizhenia tianjinensis</i>         | 86.9 |
|          |                            | <b>170</b> | 1  | 0 | 1 | 0 | 0 | Firmicutes     | <i>Clostridium hathewayi</i>            | 99.5 |
|          |                            | <b>224</b> | 1  | 0 | 1 | 0 | 0 | Proteobacteria | <i>Bradyrhizobium yuanmingense</i>      | 99.5 |
|          |                            | <b>4</b>   | 1  | 0 | 1 | 0 | 0 | Bacteroidetes  | <i>Bacteroides fragilis</i>             | 98.6 |
|          |                            | <b>41</b>  | 1  | 0 | 0 | 1 | 0 | Firmicutes     | <i>Desulfotomaculum guttoideum</i>      | 95.9 |
|          |                            | <b>62</b>  | 1  | 0 | 0 | 0 | 0 | Firmicutes     | <i>Clostridium thermocellum</i>         | 87.9 |
| <b>5</b> | <b>3.91e<sup>-07</sup></b> | <b>21</b>  | 12 | 2 | 9 | 0 | 1 | Bacteroidetes  | <i>Bacteroides caccae</i>               | 100  |
|          |                            | <b>37</b>  | 10 | 2 | 7 | 1 | 0 | Firmicutes     | <i>Eubacterium hallii</i>               | 99.7 |

|           |           |  |            |   |   |   |   |   |                |                                      |      |
|-----------|-----------|--|------------|---|---|---|---|---|----------------|--------------------------------------|------|
|           |           |  | <b>117</b> | 8 | 0 | 8 | 0 | 0 | Bacteroidetes  | <i>Parabacteroides merdae</i>        | 100  |
|           |           |  | <b>52</b>  | 8 | 0 | 8 | 0 | 0 | Bacteroidetes  | <i>Prevotella oralis</i>             | 91.1 |
|           |           |  | <b>22</b>  | 7 | 0 | 7 | 0 | 0 | Firmicutes     | <i>Clostridium aldenense</i>         | 96.4 |
|           |           |  | <b>3</b>   | 7 | 0 | 7 | 0 | 0 | Bacteroidetes  | <i>Bacteroides stercoris</i>         | 99   |
|           |           |  | <b>84</b>  | 7 | 1 | 6 | 0 | 0 | Bacteroidetes  | <i>Odoribacter splanchnicus</i>      | 99.3 |
|           |           |  | <b>14</b>  | 6 | 1 | 4 | 0 | 1 | Bacteroidetes  | <i>Bacteroides dorei</i>             | 98.6 |
|           |           |  | <b>33</b>  | 6 | 0 | 6 | 0 | 0 | Bacteroidetes  | <i>Alistipes onderdonkii</i>         | 97.1 |
|           |           |  | <b>7</b>   | 6 | 3 | 3 | 0 | 0 | Bacteroidetes  | <i>Bacteroides uniformis</i>         | 100  |
|           |           |  | <b>155</b> | 5 | 0 | 5 | 0 | 0 | Firmicutes     | <i>Desulfotomaculum guttoideum</i>   | 96.8 |
|           |           |  | <b>24</b>  | 5 | 0 | 4 | 0 | 0 | Firmicutes     | <i>Dorea formicigenerans</i>         | 100  |
|           |           |  | <b>47</b>  | 5 | 0 | 5 | 0 | 0 | Firmicutes     | <i>Clostridium lactatifermentans</i> | 95.2 |
|           |           |  | <b>20</b>  | 4 | 2 | 2 | 0 | 0 | Firmicutes     | <i>Gemmiger formicilis</i>           | 99.8 |
|           |           |  | <b>63</b>  | 4 | 0 | 4 | 0 | 0 | Actinobacteria | <i>Collinsella aerofaciens</i>       | 99   |
|           |           |  | <b>9</b>   | 4 | 2 | 0 | 2 | 0 | Firmicutes     | <i>Blautia wexlerae</i>              | 99.8 |
|           |           |  | <b>98</b>  | 4 | 0 | 3 | 1 | 0 | Firmicutes     | <i>Anaerostipes butyraticus</i>      | 97.6 |
|           |           |  | <b>166</b> | 3 | 0 | 3 | 0 | 0 | Firmicutes     | <i>Blautia luti</i>                  | 98.6 |
|           |           |  | <b>204</b> | 3 | 1 | 2 | 0 | 0 | Bacteroidetes  | <i>Bacteroides dorei</i>             | 98.4 |
|           |           |  | <b>53</b>  | 3 | 0 | 2 | 1 | 0 | Proteobacteria | <i>Sutterella wadsworthensis</i>     | 100  |
|           |           |  | <b>74</b>  | 3 | 0 | 3 | 0 | 0 | Firmicutes     | <i>Clostridium leptum</i>            | 95.2 |
|           |           |  | <b>129</b> | 2 | 0 | 2 | 0 | 0 | Firmicutes     | <i>Ruminococcus schinkii</i>         | 96.7 |
|           |           |  | <b>177</b> | 2 | 0 | 2 | 0 | 0 | Bacteroidetes  | <i>Bacteroides dorei</i>             | 98.6 |
|           |           |  | <b>31</b>  | 2 | 0 | 0 | 1 | 1 | Proteobacteria | <i>Escherichia/Shigella flexneri</i> | 99.8 |
|           |           |  | <b>49</b>  | 2 | 0 | 2 | 0 | 0 | Firmicutes     | <i>Roseburia inulinivorans</i>       | 99.6 |
|           |           |  | <b>54</b>  | 2 | 0 | 2 | 0 | 0 | Firmicutes     | <i>Clostridium orbiscindens</i>      | 95.9 |
|           |           |  | <b>78</b>  | 2 | 0 | 2 | 0 | 0 | Firmicutes     | <i>Ruminococcus lactaris</i>         | 96.1 |
|           |           |  | <b>138</b> | 1 | 0 | 1 | 0 | 0 | Bacteroidetes  | <i>Alistipes shahii</i>              | 99.8 |
|           |           |  | <b>19</b>  | 1 | 0 | 0 | 1 | 0 | Firmicutes     | <i>Ruminococcus albus</i>            | 95.7 |
|           |           |  | <b>229</b> | 1 | 0 | 0 | 0 | 0 | Firmicutes     | <i>Ruminococcus torques</i>          | 97.6 |
|           |           |  | <b>327</b> | 1 | 0 | 1 | 0 | 0 | Bacteroidetes  | <i>Bacteroides nordii</i>            | 99.5 |
|           |           |  | <b>80</b>  | 1 | 0 | 1 | 0 | 0 | Firmicutes     | <i>Eubacterium ramulus</i>           | 99.8 |
|           |           |  | <b>99</b>  | 1 | 0 | 1 | 0 | 0 | Firmicutes     | <i>Clostridium asparagiforme</i>     | 95.6 |
| <b>ND</b> | <b>ND</b> |  | <b>169</b> | 8 | 0 | 7 | 1 | 0 | Firmicutes     | <i>Ruminococcus obeum</i>            | 99.8 |
| <b>ND</b> | <b>ND</b> |  | <b>10</b>  | 6 | 1 | 5 | 0 | 0 | Firmicutes     | <i>Clostridium nexile</i>            | 99.8 |

|    |    |     |   |   |   |   |   |            |                                     |      |
|----|----|-----|---|---|---|---|---|------------|-------------------------------------|------|
| ND | ND | 151 | 4 | 0 | 3 | 1 | 0 | Firmicutes | <i>Ruminococcus obeum</i>           | 100  |
| ND | ND | 123 | 3 | 0 | 3 | 0 | 0 | Firmicutes | <i>Clostridium hylemonae</i>        | 97.5 |
| ND | ND | 46  | 2 | 0 | 2 | 0 | 0 | Firmicutes | <i>Blautia hansenii</i>             | 99.8 |
| ND | ND | 59  | 2 | 0 | 0 | 2 | 0 | Firmicutes | <i>Faecalibacterium prausnitzii</i> | 98.8 |

**Supp. Table 5: OTU correlation network composition deduced from patients with endoscopic recurrence 6 months after ICR**

Cluster: Identity of the cluster; OTUs: identity of the Operational Taxonomic Unit specific of each cluster; Total: total number of significant correlations between the identified OTU and other OTUs from the cluster; pos75: number of significant positive correlations ( $R \geq 0.75$ ) between the identified OTU and other OTUs from the cluster; pos50: number of significant positive correlations ( $R \geq 0.50$ ) between the identified OTU and other OTUs from the cluster; neg50: number of significant negative correlations ( $R \leq -0.5$ ) between the identified OTU and other OTUs from the cluster; Similarity: similarity percentage between the OTU and the first relative species. No significant negative correlation with  $R \leq -0.75$  was observed.
